# Supplementary material for: Controlled Activity of the Salmonella Invasion-Associated Injectisome Reveals Its Intracellular Role in the Cytosolic Population
Source: PubMed Central journal article supplement (PMC5717391; doi:10.1128/mbio.01931-17), 2017-12-05
Supplement: mbo006173612sf1.pdf [file mbo006173612sf1.pdf]

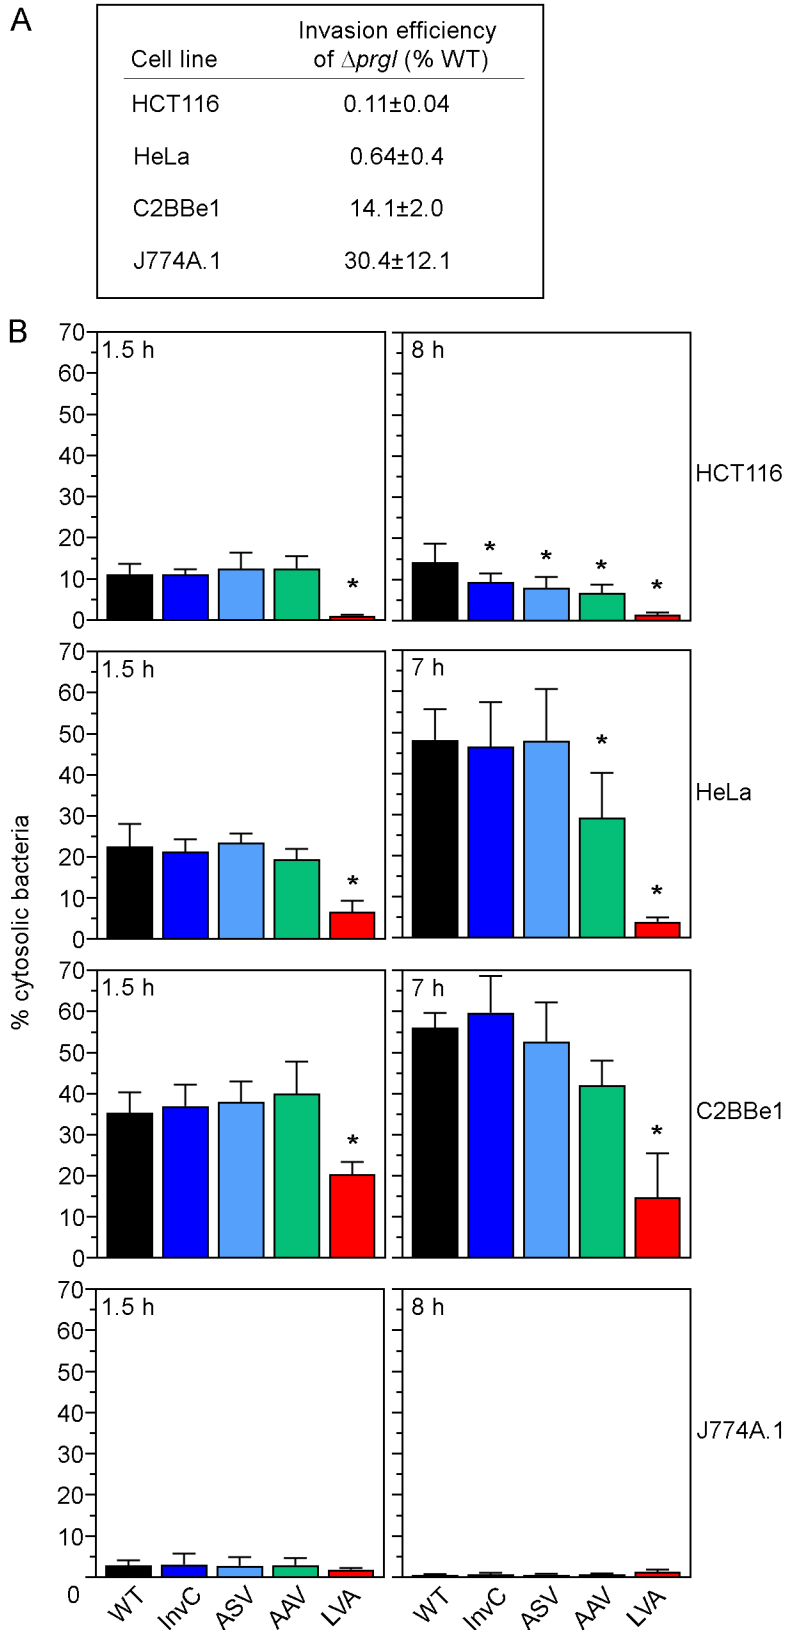

**FIG S1:** Effect of InvC destabilization in cell lines with differential requirement for T3SS1-mediated entry (A) Invasion efficiency of a T3SS1 mutant ( $\Delta prgI$ ) as determined by gentamicin protection assay in indicated cell lines at 1 h p.i., expressed as a percentage of the invasion efficiency for wild type bacteria in each cell line (set to 100%). HCT116, human colonic epithelial cells; HeLa, human cervical epithelial cells; Caco-2 C2BBe1, human colonic epithelial cells; J774A.1, mouse macrophage-like cells. (B) CHQ resistance assays in various cell lines. Bacterial subcultures were grown in the presence of 100 ng/ml ATc for 1.5 h prior to infection to induce synthesis of InvC-FLAG. MOIs were adjusted so that equivalent numbers of bacteria were internalized, and the proportion of cytosolic bacteria was determined at the indicated time points by CHQ resistance assay (mean  $\pm$  SD,  $n \geq 3$  independent experiments). Asterisks denote data significantly different from WT bacteria.
